# Supplementary material for: Network pharmacology and bioinformatics analyses identify the intersection genes and mechanism of Huangbai for Recurrent Aphthous Stomatitis
Source: Research Square preprint supplement (doi:10.21203/rs.3.rs-1564426/v1), 2022-04-27
Supplement: Supplementary file 1 [file 277a4a90018e7e8c277b81cc.xlsx]

## Sheet: Sheet1
p<0.05 |logFC|>=1	up-regulated	down-regulated		merge of up-regulated	merge of down-regulated
SEMA5B	MMP1	ZBED2		CCL2	FOS
CITED1	MMP3	SOSTDC1		COL3A1	IFNG
UPK2	CXCL11	C3orf67		CXCL10	IL1B
VENTX	IL6	LOC100505920		CXCL11	PTGS2
PATL2	CXCL10	GSTA3		CXCL8
IL10	CXCL9	PDZRN4		CYP1B1
NLRC4	SLC6A14	PP13439		HAS2
SIT1	SELL	DSC1		ICAM1
DYSF	S100A7	LINC00551		IL10
SH2D3C	CXCL6	OCA2		IL6
ZAP70	GZMB	IL12A-AS1		IRF1
HCG26	CXCL8	WNK4		MMP1
LILRA6	SFRP4	AADACL2		MMP3
AADAT	CMPK2	TMEM63C		PIK3CG
HVCN1	LILRB2	UPK2		PLAT
TDRD9	FCGR3B	CYP2F1		SELE
DHX58	MMP12	AADAT		SERPINE1
CYP2F1	SLC51A	RBM20		SPP1
RNASE2	RARRES1	CALB2		STAT1
TIGIT	CCL8	SIAH3		TNF
LINC00528	MMP10	C9orf152		VCAM1
RAB37	FCGR1B	IGFL1		XDH
NNMT	GBP5	CRISP2		NOS2
CMKLR1	CYP24A1	FOS
LOC338620	KRT24	IL1B
FMNL1	GBP1	CCL20
CTSW	BCL2A1	KRT31
CCL7	IFI6	CRISP3
DOK2	IFI44L	CXCL1
PTGER2	SELE	LOC100507221
SIRPB2	IFI27	EGR3
FLT3	C5AR1	CHI3L1
HENMT1	ADAMDEC1	IFNG
MMD	GLDC	CTTNBP2
GSTA3	IGJ	ERP27
FCRL3	GPR65	PTGS2
FZD2	FCN1	SYNPO2L
CMTM2	CD300LF	LTF
SDK1	CD1D	ELOVL4
CYP24A1	CCL7	FLG
FAM167B	RSAD2	INHBA
EID3	GREM1	PROK2
CPXM1	CXCL13	APOBEC3B
LOC100507535	LILRA6
LOC101928152	HCK
ASAP1-IT1	C1QB
OSCAR	IL12RB2
AOAH	KRT16
GBGT1	BST2
PYHIN1	PTX3
USP30-AS1	KLK6
LILRA1	AOAH
IL2RG	LYZ
MVP	CCL2
GRAMD1A	IDO2
HLA-J	LIPG
SLC6A12	RGS18
CXorf65	HLA-DMB
CR1	RNASE2
OR51E1	P2RY6
RGS19	TIMP1
PIK3R3	LAMP3
P2RY8	CD177
TCN2	PLA2G7
CD1D	APOL1
LIF	CCL18
IL18RAP	ISG15
DTX3L	APOL3
TMC8	EPSTI1
CSF3R	UBE2L6
CFP	ZAP70
TXK	DDX60
EMILIN1	TAP1
APELA	IFIT3
SLC16A4	IL36G
IGFLR1	MX1
MIAT	CD163
LOC101927841	CD69
TNFRSF18	CSF3R
GPR65	IFI44
IL12A-AS1	TNFSF13B
GBP1P1	IRG1
SLC51A	LILRA3
LILRA3	SLC16A4
HLA-DMB	TNFAIP6
SLC43A2	WARS
STAT5A	C16orf54
MARCO	COL4A1
SLC22A4	FBN1
TEX29	STAT1
IPCEF1	EVI2A
RGS18	LYPD1
PDE3B	PTGER2
SERPINI1	CSF2RB
C5AR1	C10orf99
TWIST2	GBP2
KMO	NCF2
AMICA1	LAP3
GPRIN3	HLA-J
SLC7A11	MNDA
ZEB2	CTHRC1
KLHL6	LYN
SOD3	MT1M
ADRBK2	HCLS1
LILRB1	CCL4
KBTBD8	ZC3H12D
LILRB5	HSD11B1
CD72	FAM26F
LOC100505812	P2RY8
ATP8B4	CCL19
SMAP2	SERPINE1
LOC100505920	CD14
ERV3-2	AMICA1
STK17B	C1R
S1PR1	GBP4
CSF2RA	MRC1
PP13439	CHI3L2
GALNT15	CXCR4
PCSK1	SEMA5B
CD163L1	IFITM1
RNF166	NAPSB
BTK	BATF2
LILRB2	KIAA0226L
VSIG4	PLAT
EVI2A	GPR171
TNFAIP8L2	GPR18
GLIPR1	LY96
OCA2	SERPING1
KLRF1	IL7R
HCST	COL15A1
IFIT5	VCAM1
CLCA3P	TLR2
WIPF1	NLRC3
ADAM12	CCR1
CRTAM	COL6A3
HCK	GNLY
DOCK10	COMP
NCKAP1L	FAM65B
CCR6	IL33
DOCK11	C8orf4
CD300LF	SAMSN1
SERPINE1	XDH
MYO1B	GPR84
LINC00968	CD97
CD163	VCAN
IDO2	RASSF2
SOAT1	NLRC5
LINC01215	CFP
LY96	TLR1
TLR7	GALNT15
SLFN12	CSF3
TPK1	GPR183
COTL1	MPEG1
CD48	PLAUR
C9orf152	CDH3
PARP14	SPRR2C
FPR3	SRGN
HHEX	IL18RAP
STAP1	SLC22A4
UBE2L6	SLC2A3
CLEC10A	KLRC3
ADAMDEC1	TNF
ENTPD1	CRTAM
ADA	MYO1B
RASD1	OAS2
C1S	CCR7
EGR2	HSD17B2
MT1M	IL4I1
CD74	IFIT1
FKBP10	IRF1
ST8SIA4	PTPRC
CD27	CPXM1
ZNFX1	IRF8
C1QB	TGFBI
IL21R	SNX10
TNF	TYMP
STAT1	COTL1
KLF10	FYB
ITGB2	TFEC
LAIR2	ITK
CSF3	LINC01215
SOCS3	PI15
PIK3CG	KLHL6
MX1	RTP4
C16orf54	PSMB9
TMEM170B	ADAMTS1
CHST11	AKR1B10
GK3P	CEACAM7
CD3G	BIRC3
PLA2G7	IFI35
CEBPD	PARP12
FCN1	IGFLR1
LILRA5	TRIM22
MS4A6A	IL2RG
P2RY6	FPR3
VNN2	AIM2
CPVL	CFB
APOL3	ST8SIA4
TGFBI	SLAMF8
HLA-G	MRGPRX3
BCL6	CD48
FCGR3B	SOD2
SLC41A2	MUC4
CRISP2	C3
OAS2	PLA2G2A
IL4I1	DYSF
TMEM63C	WIPF1
NLRC5	APELA
THEMIS	C1S
RASSF2	THEMIS2
LCK	KBTBD8
SIGLEC1	CHST11
ARPC1B	PLA1A
IL18R1	ISG20
NCF4	NLRC4
TAGAP	CLU
GPR18	IL24
TAP1	CMKLR1
NLRC3	XAF1
FCGR1B	LAPTM5
ACSL5	FCER1G
SELL	CTGF
TNFSF10	IL10RA
KIAA0226L	DTX3L
TLR8	RARRES3
RAB31	PATL2
GREM1	PLEKHO1
FAM65B	CYTIP
PI15	DOK2
APOL1	ARPC1B
PLA1A	IL15
BTN3A3	SLC7A7
ANGPTL2	VNN2
SOD2	CECR1
APOL6	BTN3A3
CFB	HLA-DPA1
IFI27	GZMA
HLA-C	TXK
NAPSB	TEX29
KLRC3	C2CD4A
LCP2	BCL6
ALOX15B	PXDN
NOS2	CLEC4C
SRGN	HHEX
GLIS3	OASL
BICC1	KMO
PTGFR	TMEM170B
ZBP1	TREM1
ACOT9	CORO1A
HLA-DPB2	MS4A7
TCL1A	CD86
IFITM1	CEBPD
VCAM1	CD274
ITK	EMILIN1
GCA	SLC26A9
LAPTM5	GIMAP2
PARP12	COL3A1
IL15	SDK1
HAS2	S1PR1
CECR1	LCP2
LAP3	GLIS3
ITGAM	CD248
DDX60	IGSF6
VGLL3	GIMAP4
GBP1	TLR8
RHOH	SLC7A11
IFIH1	MS4A1
HCLS1	THBS2
MRC1	NCKAP1L
EPSTI1	LOC100507535
CMPK2	C1QC
STOM	IRF7
GLDC	COL4A2
RAC2	DHX58
COL4A1	MARCO
ADAMTS1	HSPA6
SLAMF8	THY1
RGL1	TNFRSF1B
CXCR4	CPVL
LUM	CITED1
MCOLN2	MS4A14
FAM222A	CYR61
CLEC4C	TMEM173
CD248	RAB31
APOLD1	DDX58
CLU	CLIC2
GIMAP4	MYO1F
GBP2	TNFRSF18
STX11	CTSS
NCF2	MS4A4A
CD97	GBGT1
GPR137B	TWIST2
CLEC2B	IFITM2
GZMB	RHOH
MS4A4A	LILRB1
MYO1F	IFITM3
ICOS	RGS19
ENPP2	PDE4B
PSMB10	ADA
UCP2	IFIH1
MNDA	CMTM2
PLEKHO1	LINC00968
SLFN5	RAB37
FBN1	CFI
RARRES1	SIRPB2
TIMP1	PCSK1
MS4A14	PARP14
OAS1	RNF166
LHFPL2	IL10
THBS2	SLC43A2
GIMAP2	SECTM1
CD52	ACSL5
C1R	SOCS3
CALB2	FCRL3
ADAP2	CD52
LGALS1	ZNFX1
FGL2	SIT1
FYB	DOCK11
LYN	STEAP4
CD3D	C12orf75
PTPRC	GLIPR1
LRRC32	CYP1B1
ITGA4	SASH3
IL6	MSRB1
SAMHD1	TYROBP
IFITM3	IFIT2
MMP3	IL21R
HSD11B1	SOD3
IFI44	FMNL1
TRIM22	ENTPD1
CTSC	RASGRP1
GLRX	ITGAM
SAMSN1	ELTD1
TLR1	AEBP1
IL10RA	THEMIS
ZC3H12D	GK3P
MS4A1	LILRB5
BIRC3	HLA-G
ITGAL	ITGAL
LOXL1	C1QA
IFI6	CSF2RA
DAB2	CD3G
CD86	GBP3
BST2	NNMT
CORO1A	TDRD9
MMP1	SLFN12
HRH1	HLA-DMA
CD14	ITGA4
TNFSF13B	ZBP1
COMP	LOC101927841
SLA	FZD2
SLC7A7	ATP8B4
CASP7	ALOX12B
CLIC2	HLA-B
COL15A1	ACOT9
HLA-B	MIAT
THEMIS2	CD93
AKR1B10	TIGIT
GK	FKBP10
TMEM176A	CD3D
MRGPRX3	C1orf162
MPEG1	UCP2
RTP4	COL5A2
LAMP3	VEGFC
SFRP4	TMEM176A
TFEC	VGLL3
COL6A3	LINC00528
FAP	SAMD9L
MYO1G	PCDH17
PLAUR	STK17B
FAM20A	ICAM1
STEAP4	VSIG4
CFI	PYHIN1
CD177	GPRIN3
IFITM2	TNFAIP3
SLC16A1	CXCL5
TMEM173	MVP
FAM26F	BTK
CTSL	EGR2
CTSS	FAM222A
2022-03-01	ERV3-2
PARP9	CLEC10A
GPR84	FLT3
CD274	LCK
MSRB1	SOAT1
IL12RB2	PRKCDBP
CYP1B1	MARCKSL1
DDX58	HAS2
TOX2	FBXO6
THY1	CTSW
PCDH17	NCF4
C3	FAP
PIK3AP1	MS4A6A
TREM1	PSMB10
TMEM71	IPCEF1
EVA1C	LOC338620
PDE4B	TMC8
PRKCDBP	SULF1
IRF8	FGL2
LYPD1	CTSL
C10orf99	CD72
MUC4	TMEM71
GMFG	SLC16A1
GZMA	SIGLEC1
IFI44L	ANGPTL2
GNLY	IL18R1
CD93	CLEC2B
WISP2	PIK3R3
HLA-DPA1	IGFBP4
HSPA6	GCA
SERPINH1	HCP5
GPR183	CD83
SASH3	MRGPRF
XDH	LOC100505812
HLA-DRB1 /// HLA-DRB1	TCN2
SULF1	TNFSF10
C1orf162	LUM
ACSL4	APOLD1
S100A7	HLA-C
SAMD9L	LRG1
GCH1	PDZK1IP1
PSMB9	ZEB2
CD69	CTSC
TLR2	DUSP6
IFIT1	APOL6
AEBP1	HERC5
CEACAM7	LGALS2
CXCL11	MYO1G
IGFBP4	SMAP2
COL5A2	LOXL1
CYP27C1	HENMT1
CST7	CLCA3P
COL3A1	CXorf65
CHI3L2	COL1A2
CYTIP	TPK1
HERC5	ALOX15B
IGSF6	TLR7
LIPG	RNASE6
SELE	LAIR2
ELTD1	CD27
SELP	NOS2
XAF1	CST7
CTHRC1	RGS1
HCP5	EID3
SERPINA1	FSTL1
RASGRP1	ITGB2
CSF2RB	FAM20A
KRT16	ICOS
TYROBP	WISP2
TNFRSF1B	CR1
VCAN	USP30-AS1
SLC6A14	GMFG
VEGFC	GRAMD1A
SELM	LHFPL2
TYMP	CASP7
SLC2A3	RGL1
LGALS2	RAC2
SERPING1	ACSL4
RARRES3	FABP4
MS4A7	STAT5A
IRF7	SLC6A12
CCL2	LIF
FPR1	ASAP1-IT1
ICAM1	LGALS1
C8orf4	TMEM45A
CCL19	GPR137B
RGS1	OAS1
IRF1	FAM167B
GBP4	TCL1A
AIM2	CD38
CDH3	SLA
GBP5	CTSK
DSC1	PDE3B
RBM20	SLC41A2
FSTL1	CD163L1
COL4A2	SERPINA1
CCL18	HVCN1
CTGF	SPP1
C1QA	ADRBK2
RNASE6	ENPP2
C1QC	2022-03-01
GBP3	GLRX
GPR171	SERPINH1
MARCKSL1	HLA-DRB1 /// HLA-DRB1
C12orf75	LOC101928152
IFIT3	VENTX
PXDN	LRRC32
SPP1	SERPINI1
FABP4	KLF10
CXCL6	BICC1
IL7R	SLFN5
CXCL13	GCH1
CYR61	STAP1
HSD17B2	MCOLN2
CCR1	TNFAIP8L2
CXCL9	ADAP2
OASL	SELP
BATF2	FPR1
DRAM1	PARP9
MRGPRF	ADAM12
KLK6	GK
SNX10	PTGFR
FCER1G	GBP1P1
ISG15	PIK3CG
HLA-DMA	IFIT5
IL33	HRH1
IFI35	MMD
CCL4	STOM
BCL2A1	SAMHD1
PDZRN4	LILRA1
PLAT	SLC6A1
CXCL8	TAGAP
CXCL10	DOCK10
CD83	RASD1
RSAD2	CCR6
NID2	HCST
DUSP6	STX11
PDZK1IP1	CYP27C1
FBXO6	HCG26
IFIT2	CD74
LYZ	OSCAR
SLC26A9	HLA-DPB2
CTSK	DAB2
SECTM1	SELM
CXCL5	DRAM1
MMP12	NID2
MMP10	OR51E1
CCL8	EVA1C
TNFAIP3	KLRF1
WARS	TOX2
LINC00551	HLA-DRA
ISG20	LILRA5
CD38	SH2D3C
IGJ	PIK3AP1
C2CD4A
TMEM45A
SPRR2C
PTX3
SLC6A1
HLA-DRA
IL36G
CCR7
IL24
IRG1
KRT24
SOSTDC1
PLA2G2A
SIAH3
IGFL1
ZBED2
ALOX12B
AADACL2
C3orf67
WNK4
COL1A2
LRG1
TNFAIP6
IL1B
CCL20
KRT31
CRISP3
CXCL1
LOC100507221
EGR3
CHI3L1
IFNG
CTTNBP2
ERP27
PTGS2
SYNPO2L
FOS
LTF
ELOVL4
FLG
INHBA
PROK2
APOBEC3B
